1 Localization of the putative recombinase Pf-int to the apicoplast of  
2 *Plasmodium falciparum*

3

4 A. V. Berglar<sup>1,2,\*</sup>, S. S. Vembar<sup>3,\*\*\*</sup>, D. N. Gopaul<sup>1,\*\*</sup>

5

6 <sup>1</sup>Department of Genomes and Genetics, Unité Plasticité du Génome Bactérien, CNRS, UMR 3525, Institut Pasteur,

7 Université de Paris, F75015, Paris, France

8 <sup>2</sup>FdV (now : FIRE) Doctoral School 474 Centre de Recherches Interdisciplinaires, Université de Paris, Paris, France

9 <sup>3</sup>Département de Parasites et Insectes Vecteurs, Unité Biologie des Interactions Hôte-Parasite, Institut Pasteur,

10 Université de Paris, CNRS, ERL 9195, INSERM, UMR 1201, F-75015 Paris, France

11 \*Current affiliation : SciVisLab - Scientific Visualisation Lab, Cologne, Germany

12 \*\*Current affiliation : Department of Education, Institut Pasteur, Université de Paris, F-75015 Paris, France

13 \*\*\*Current affiliation : Institute of Bioinformatics and Applied Biotechnology, Bengaluru, India

14

15

16 Corresponding author

17 E-mail: [deshmukh.gopaul@pasteur.fr](mailto:deshmukh.gopaul@pasteur.fr) (DNG)

## 18 **Abstract**

19 Diseases caused by apicomplexan parasites, such as malaria and toxoplasmosis cause ~200 million  
20 (worldwide) and 1 million (Europe) infections, respectively, every year. Apicomplexa possess a  
21 non-photosynthetic organelle homologous to the plant chloroplast, the so-called apicoplast, that is  
22 essential for their growth and survival. This study focused on the Int recombinase, the first protein  
23 discovered in *Plasmodium spp.* with the features of a site-specific recombinase, and which has an  
24 apicoplast targeting leader sequence at its amino-terminus. Int is conserved amongst several  
25 apicomplexan parasites. In the human toxoplasmosis parasite, *Toxoplasma*, Int localizes to the  
26 apicoplast and Pf-Int, the *P. falciparum* member, belongs to the group of non-mutable essential  
27 genes in *P. falciparum*. A conserved protein that has been shown to be essential at least in one  
28 species and that localizes to an essential organelle may become a novel drug target. Therefore, the  
29 aim of this study was to confirm the sub-cellular localization of Int in the human malaria parasite *P.*  
30 *falciparum*. Using western blot analysis and immunofluorescence microscopy of *P. falciparum*  
31 asexual blood stages, we observed that Int partially co-localized with the apicoplast (to discrete foci  
32 adjacent to the nucleus).

33

34

35 **Keywords:** *P. falciparum*; *apicoplast*; *integrase*; *DNA recombination*; *malaria*;

36

## 37 Introduction

38 Parasites of the phylum apicomplexa cause diseases like malaria and toxoplasmosis and are  
39 therefore an important health and socio-economic threat to mankind. The eukaryotic parasite  
40 *Plasmodium falciparum* is the main causative agent of Malaria, which generates ~200 million  
41 infections and ~400,000 deaths every year [1]. *Toxoplasma* gives rise to toxoplasmosis, a severe  
42 disabling condition, which is responsible for over one million infections per year in the European  
43 region through contaminated food [2]. The lack of effective vaccines highlights the need for novel  
44 drug targets against these organisms.

45  
46 Like all apicomplexan parasites, *Plasmodium* and *Toxoplasma* have evolved from a common  
47 photosynthetic red algal ancestor [3]. They harbor an organelle named the apicoplast. The  
48 apicoplast was first identified in *T. gondii* [4] and is a non-photosynthetic plastid with four  
49 membranes and is homologous to the plant chloroplast. It has been hypothesized to have been  
50 evolutionarily derived by secondary endosymbiosis. Even though this plastid has lost the ability to  
51 perform photosynthesis over time, it has been retained and serves essential purposes such as fatty  
52 acid, isoprenoid precursor, Fe-S cluster and heme biosyntheses[5–7]. The apicoplast carries 1 to 15  
53 copies of a mostly circular 35 kb genome and autonomously performs replication synchronized with  
54 schizogony, transcription and translation events [8–10]. These events require plastid DNA copy  
55 number management. None of the proteins expressed by the apicoplast genome fulfills this role.  
56 The majority of all apicoplast proteins, however, are nuclear-encoded and are targeted to the  
57 apicoplast via a N-terminal bipartite targeting sequence, consisting of a translocation sequence and  
58 a transit peptide [11–13] (Fig 1). Once imported to the apicoplast, these nuclear-encoded proteins  
59 complement the 30 apicoplast-encoded proteins for all remaining plastid activities [14–16].

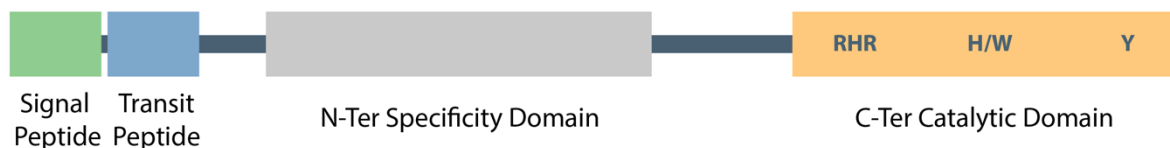

60

61 **Fig 1. Int protein domain map.** Ints as members of Tyr-recombinases are composed of multiple  
62 domains. In apicomplexans they also carry a targeting peptide in their N-terminus. The main N-  
63 terminal region in Tyr-recombinases are variable in sequence, providing specificity. The C-terminal  
64 catalytic domain carries the conserved active site residues involved in DNA cleavage, strand  
65 exchange and religation. All members of the Apicomplexa shown here carry the conserved residues  
66 of the catalytic domain: R-K/H-H-R-H/W-Y (S1 Fig).

67  
68 We previously proposed the nuclear-encoded protein Pf-Int (*PF3D7\_1308800*) of *Plasmodium*  
69 *falciparum* to be an integrase and we partially characterized it as a putative tyrosine site-specific  
70 recombinase (Y-SSR) for DNA binding [17]. Pf-Int has been shown to be essential in a study by  
71 Zhang et al. (2018) [18]. It was part of the 2.9% of genes that were not only non-mutable, but that  
72 also did not have any Piggy Bac transposon insertions even in their intergenic regions. SSRs in  
73 general are involved in a variety of cellular processes such as genome replication, recombination  
74 and repair, the impairment of which results in malfunctioning of the organism or interference in the  
75 mobility of genetic elements [19–22]. The SSRs require a DNA recombination site ranging between  
76 30 to 200 base pairs in length. These sites contain two motifs with partial inverted repeat (IR)  
77 symmetry that flank a central crossover region where DNA strand exchange occurs [23]. Potential  
78 outcomes of a recombination event can be insertion, excision or inversion [19] depending on the  
79 orientation of the two sites. In practice, this mechanism is used for genome decatenation,  
80 partitioning or gene shuffling.

81  
82 Pf-Int is composed of 490 amino acids (~58 kDa) and is conserved among six members of  
83 *Plasmodium spp.*, namely the human infecting *P. falciparum*, *P. vivax* and *P. knowlesi*, as well as  
84 the rodent infecting *P. berghei*, *P. yoelii* and *P. chabaudi*. Conservation of the C-terminal core part  
85 of the protein extends to other members of Apicomplexa in the branches Hematozoa and Coccidia,  
86 which are all obligate parasites. Using BLAST, we were able to identify the un-annotated homologs

87 of Pf-Int in *Vitrella brassicaformis* and *Eimeria maxima* (S1 Fig and S2 Fig). This points to the  
88 universal distribution of Int among Apicomplaxa that have retained an apicoplast during evolution.  
89 Pf-Int shares homology with other well-known Y-SSRs, such as phage  $\lambda$ -Int, P1 phage Cre,  
90 bacterial XerC/XerD, the integron encoded VchInt1b (Int4) of *Vibrio cholerae*, and *P. aeruginosa*  
91 Int1 mainly in terms of active site residues and polypeptide length of the catalytic domain (amino  
92 acid 192-490) [24]. Pf-Int and its homologs in apicomplexa are predicted to encode substantial N-  
93 terminal extensions thought to act as plastid-targeting peptides [11]. Nuclear-encoded apicoplast  
94 proteins that are targeted into the organelle require multiple trafficking steps from the outermost  
95 membrane through the subsequent intermembrane compartments into the lumen [25] (Fig 2).  
96 Typically, the upstream portion of the bipartite leader acts as a classical signal peptide that  
97 facilitates the co-translational insertion of the protein into the rough endoplasmic reticulum (ER).  
98 After cleavage of the signal peptide (SP) by the signal peptidase, the downstream N-terminal transit  
99 peptide, similar to those found in plants, is exposed. This transit peptide (TP) directs the trafficking  
100 of the protein into the stroma of the apicoplast over either of two different pathways, directly or  
101 through the golgi (for details see Fig 2).



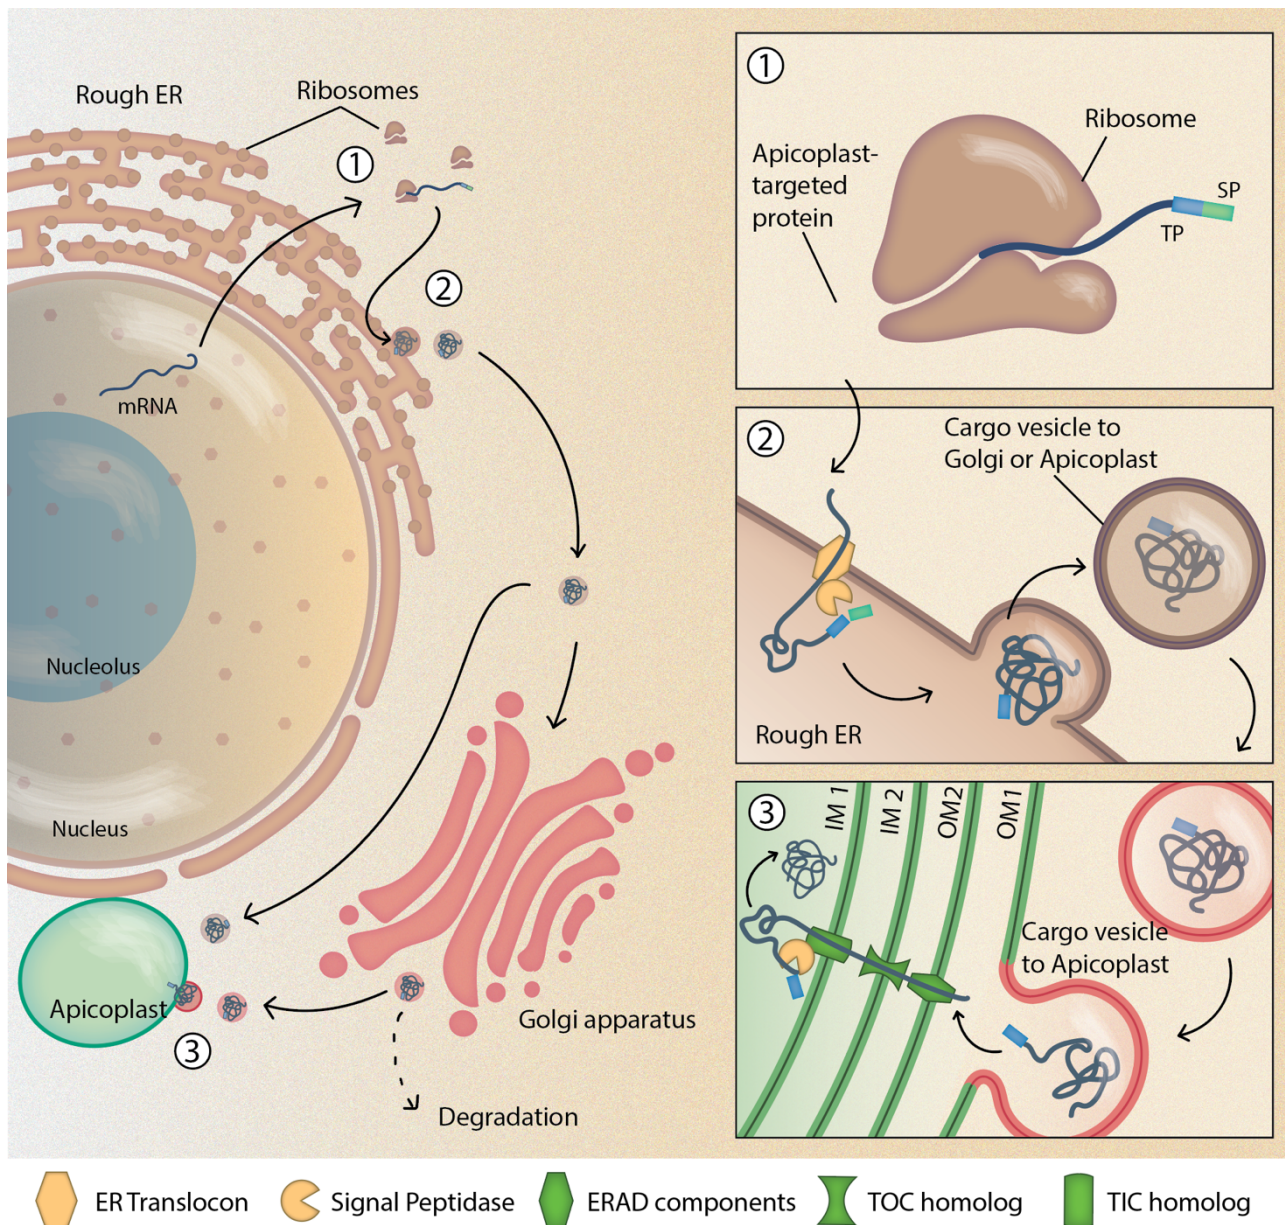

104 **Fig 2. Protein targeting to the apicoplast.** 1. The apicoplast destined protein is translated at the  
 105 ribosome. It has a bipartite leader sequence consisting of a signal peptide (SP, green), which directs  
 106 the protein to the ER, and a transit peptide (TP, blue), which later mediates the transport across the  
 107 apicoplast membranes. 2. From the endoplasmic reticulum (ER), where the SP is cleaved off by a  
 108 peptidase, ER-vesicles carry the cargo either directly to the apicoplast (11), or to the Golgi  
 109 apparatus, a branchpoint for protein sorting (23,24). 3. Golgi vesicles then fuse with the outermost  
 110 membrane (OM1) of the apicoplast. Subsequently, the TP guides it across the second outermost  
 111 membrane (OM2) via an ER-associated degradation (ERAD)-like translocon (25). The second

112 innermost membrane (IM2) is crossed via the outer chloroplast-like membrane (TOC) and the  
113 innermost membrane (IM1) via the inner chloroplast-like membrane (TIC) translocons,  
114 respectively. In the apicoplast stroma, the TP is cleaved off and the protein adopts its final  
115 conformation. Proteins with transmembrane domains anchor themselves in one of the membranes  
116 (26,27). Figure © AVB.

117  
118 The functional role of Int as an integrase is implied with the conservation of critical catalytic  
119 residues and protein domains associated with integrases. We hypothesize the role of Int in the  
120 apicoplast to be associated with plastid DNA. The homologous protein of Pf-Int in *Toxoplasma*  
121 *gondii* (Tg-Int; *TGME49\_259230*, previously *TGME49\_059230*) had independently been identified  
122 during a screen of novel apicoplast-resident proteins [26]. The coding sequence of Tg-Int includes a  
123 phage integrase domain and a SAP motif. SAP domain proteins are very well conserved from yeast  
124 to human, and have been shown to be involved in DNA repair [27], as well as in chromosomal  
125 organization [28]. Here, we provide evidence for the co-localization of the integrase to the  
126 apicoplast in *P.falciparum*.

127

## 128 **Materials and Methods**

### 129 **Antibodies used in this study**

130 *Table 1 Antibodies used in this study.*

| Name                                         | Primary antibodies               |                                  |                                       | Secondary antibodies                                        |                                                                            |                                                                              |
|----------------------------------------------|----------------------------------|----------------------------------|---------------------------------------|-------------------------------------------------------------|----------------------------------------------------------------------------|------------------------------------------------------------------------------|
|                                              | Rat Anti Pf-Int C192             | Rat Anti Pf-Int C192             | Anti-HA tag antibody [12CA5] (ab1424) | Amersham ECL Rat IgG, HRP-linked whole antibody (from goat) | Goat anti-Rat IgG (H+L) Cross-Adsorbed Secondary Antibody, Alexa Fluor 488 | Goat anti-Mouse IgG (H+L) Cross-Adsorbed Secondary Antibody, Alexa Fluor 568 |
| Clonality                                    | Polyclonal                       | Polyclonal                       | Monoclonal                            | n/a                                                         | Polyclonal                                                                 | Polyclonal                                                                   |
| Host species                                 | Rat                              | Rat                              | Mouse                                 | Goat                                                        | Goat                                                                       | Goat                                                                         |
| Commercial supplier or source laboratory     | Eurogentech                      | Eurogentech                      | AbCam                                 | Amersham (GE Healthcare)                                    | ThermoFisher Scientific                                                    | ThermoFisher Scientific                                                      |
| Catalogue or clone number                    | n/a custom-synthesized           | n/a custom-synthesized           | ab1424                                | NA935                                                       | A-11006                                                                    | A-11004                                                                      |
| Batch number                                 | n/a                              | n/a                              | n/a                                   | n/a                                                         | n/a                                                                        | n/a                                                                          |
| Antigen(s) used to raise the antibody        | Purified recombinant Pf-Int C192 | Purified recombinant Pf-Int C192 | n/a                                   | n/a                                                         | n/a                                                                        | n/a                                                                          |
| Public identifier from the Antibody Registry | n/a                              | n/a                              | AB_301017                             | AB_772207                                                   | AB_2534074                                                                 | AB_2534072                                                                   |
| Final antibody concentration or dilution     | 1:500 (WB)                       | 1:250 (IFA)                      | 1:500 (IFA)                           | 1:10,000 (WB)                                               | 1:1000 (IFA)                                                               | 1:1000 (IFA)                                                                 |
| See figure                                   | 3A                               | 3B, 3C                           | 3C                                    | 3A                                                          | 3B, 3C                                                                     | 3C                                                                           |

131

### 132 ***P. falciparum* parasite culture**

133 Red blood cells were obtained from the Etablissement Français du Sang of Necker hospital, Paris,  
 134 under agreement with Institut Pasteur, and following the guidelines for informed consent of donors  
 135 for the use of blood or its derivatives for research purposes. The red blood cells were completely  
 136 de-identified before researchers accessed the samples. *P. falciparum* blood stage parasites from the  
 137 3D7 strain [29] were cultured using modifications to the method described by Trager and Jensen  
 138 [30]. Parasites were grown in 0<sup>+</sup> human erythrocytes in RPMI 1640 medium containing l-glutamine  
 139 (Invitrogen) supplemented with 2X Hypoxanthine, 50 µg/ml gentamycine, 5% (v/v) human serum  
 140 (PAA Laboratories GmbH) and 5 % v/v Albumax II (Invitrogen) at 37°C in a gas environment of 5



141 % CO<sub>2</sub>, 5 % O<sub>2</sub> and 90 % N<sub>2</sub> in Falcon culture flasks. The culture medium was changed every 48 h  
142 by aspiration and the parasite were diluted in fresh RBCs according to parasitemia. Synchronization  
143 of cultures consisted of two consecutive 5% sorbitol (Sigma) treatments [31]. We estimated by  
144 giemsa staining that the parasites were synchronized within a window of ~6 h.

### 146 ***Fractionation of P. falciparum total protein content***

147 The total protein content of synchronized *P. falciparum* parasites was fractionated into cytoplasmic  
148 and nuclear fractions after Oehring et al. (2012) [32] with some modifications. Briefly, parasites  
149 2x10<sup>10</sup> ring stages (2-20 hpi); 10<sup>10</sup> trophozoites (20-34 hpi); 5x10<sup>9</sup> schizonts (34-48 hpi) were  
150 released from RBCs by saponin lysis and washed three times in PBS. Parasites were lysed in a  
151 hypotonic cytoplasmic lysis buffer CLB (20 mM HEPES (pH 7.9), 10 mM KCl, 1 mM EDTA, 1  
152 mM EGTA, 0.65 % NP-40, 1 mM DTT, Complete TM protease inhibitors (Roche Diagnostics)) for  
153 5 min on ice. Nuclei were pelleted at 2,000 x g for 5 min and the supernatant saved (cytoplasmic  
154 extract; fraction 1). After four to seven washes in CLB the pellet was solubilized in 1.5 ml (3 ml)  
155 SDS extraction buffer SEB (2 % SDS, 10 mM Tris-HCl (pH 7.5)) for 20 min under constant  
156 agitation at room temperature, cleared by centrifugation at 13,000 rpm for 15 min and saved (SDS  
157 extract; fraction 2). Large volumes for SDS-PAGE were concentrated by trichloroacetic acid (TCA)  
158 precipitation.

### 160 **TCA precipitation**

161 One volume of TCA stock (100% (w/v) TCA) was added to four volumes of protein sample and  
162 incubated for 10 min at 4°C. The samples were spun in a microcentrifuge at 14,000 rpm for 5 min.  
163 The protein pellet was washed twice with 200 µl cold acetone (Carlo Erba Reagents). The pellet  
164 was dried by placing the tube in a 95°C heat block for 5-10 min. For SDS-PAGE, sample buffer  
165 was added and the samples were heated for 10 min at 95°C before loading onto the gel.

166

## 167 **Western blot analysis of Pf-int expression in blood stage parasites**

168 An SDS-PAGE with fractionated protein samples was run in 6x SDS Loading buffer (Laemmli, 2%  
169 SDS) to a final concentration of 1x. Samples were run on a 4-12% Bis-Tris SDS gel (NuPage,  
170 Invitrogen), 40 min at 200 V in MES running buffer (Novex® Invitrogen) or 60 min at 180 V in  
171 MOPS (Novex® Invitrogen) running buffer. As molecular marker, we used the PAGE Ruler™  
172 Prestained Protein ladder 10-180 kDa (Fermentas). Recombinant and purified Pf-int was used as a  
173 control. Its preparation is described elsewhere [17].

174

175 Western blot analyses were carried out using a rat antibody raised against purified recombinant Pf-  
176 int (aa 192-490) (Eurogentec, Belgium). The protein content was transferred to a nitrocellulose  
177 membrane using the Trans Blot Turbo (BioRad) device program MIXED MW (5-150 kDa, 7 min,  
178 1.3 A up to 25 V). The membrane was immediately placed into saturation buffer and incubated for  
179 1 hour at RT with agitation, then incubated with the primary antibody at 1:500 dilution for 1 h at  
180 RT or o/n at 4°C. The membrane was then incubated with the secondary antibody (1:1000 dilution  
181 of goat  $\alpha$ rat-HRP) for 1 h at RT or o/n at 4°C. 4x 5 min Washing buffer washes at RT and with  
182 agitation were done after each incubation step. Blots were developed using the femto kit (Thermo  
183 Fisher Scientific).

184

## 185 **Localization studies in *P. falciparum* via Immunofluorescence assay**

186 Localization studies were carried out using a rat antibody raised against purified recombinant Pf-int  
187 (aa 192-490) (Eurogentec, Belgium). Fixed parasites were spotted in each well of the microscopy  
188 slide and air-dried at RT in order to allow the parasites to adhere. The wells were blocked for 30  
189 min at RT with 15  $\mu$ l PBS+1% BSA (filter sterilized, Sigma Aldrich). The primary antibody  
190 solution was prepared in PBS + 1% BSA. The optimal antibody concentration was determined by  
191 dilution series. No primary antibody or pre-immune serum controls were used. 10  $\mu$ l of primary  
192 antibody solution were added to the corresponding wells and incubated in a humid chamber for 1 h

193 at RT or o/n at 4°C. Each well was washed thrice with PBS for 5 min at RT. 10 µl of the secondary  
194 antibody (AlexaFluor®), prepared in PBS + 1% BSA, were added to each well at a dilution of  
195 1:1000 and incubated for 30 min at RT. Each well was washed thrice with PBS + 0.5% Tween-20  
196 for 5 min at RT. After the final wash, 3 µl of PROLONG Gold Antifade + DAPI solution were  
197 added to each well and the slide was covered with a clean coverslip (Menzel) and sealed with nail  
198 varnish. The finished slide was visualized under an Eclipse 80i microscope (Nikon).

199

200

## 201 **Results**

202 In this study, we performed immunolocalization studies of a putative apicomplexan integrase Int  
203 using immunofluorescence assays (IFA) in *P. falciparum*. In the following, we report the results of  
204 our investigation.

205

### 206 ***P. falciparum* Int is translocated to the apicoplast**

207 To determine the localization of Pf-Int in asexual blood stages of *P. falciparum*, cellular  
208 fractionation studies and western blot analysis were performed with rat anti-Pf-Int antibodies on *P.*  
209 *falciparum* cellular extracts. In general, the cytoplasmic fraction contains soluble proteins while the  
210 nuclear fraction contains nuclear, nuclear-associated, membrane-associated as well as  
211 intraorganellar, therefore also apicoplast proteins [32]. Fig 3A (top row lane 3) shows the  
212 characterization of Pf-Int in whole cell extract (wce), cytoplasmic (cyt) and nuclear (nuc) fractions  
213 for wild-type *P. falciparum* 3D7 ring stage parasites. The control shows a purified 35 kDa  
214 recombinant fragment of Pf-Int (C192) reaching from amino acid 192 to 490, the C-terminus [17].  
215 A band of ~60 kDa in size corresponding to the full length Pf-Int was identified in the nuclear  
216 fraction, therefore potentially associated with the apicoplast.

217

218 Additionally, immunolocalization studies were performed using anti-Pf-Int antibodies on a mixed  
219 population of ring, trophozoite and schizont stage parasites of the wild-type 3D7 strain. Pf-Int was  
220 localized to a region adjacent to the nucleus, predominantly as a single punctum (Fig 3B, columns 2  
221 and 3). This finding was in accordance with our results from the cellular fractionation studies.  
222 Based on these results, the co-localization of Pf-Int was investigated with the apicoplast marker  
223 outer-apicoplast-membrane triose phosphate transporter (PfoTPT) in TPT-HA transformed parasites  
224 [33]. The co-localization of Pf-Int with the apicoplast marker was confirmed (Fig 3C, columns 5, 7  
225 and 8).

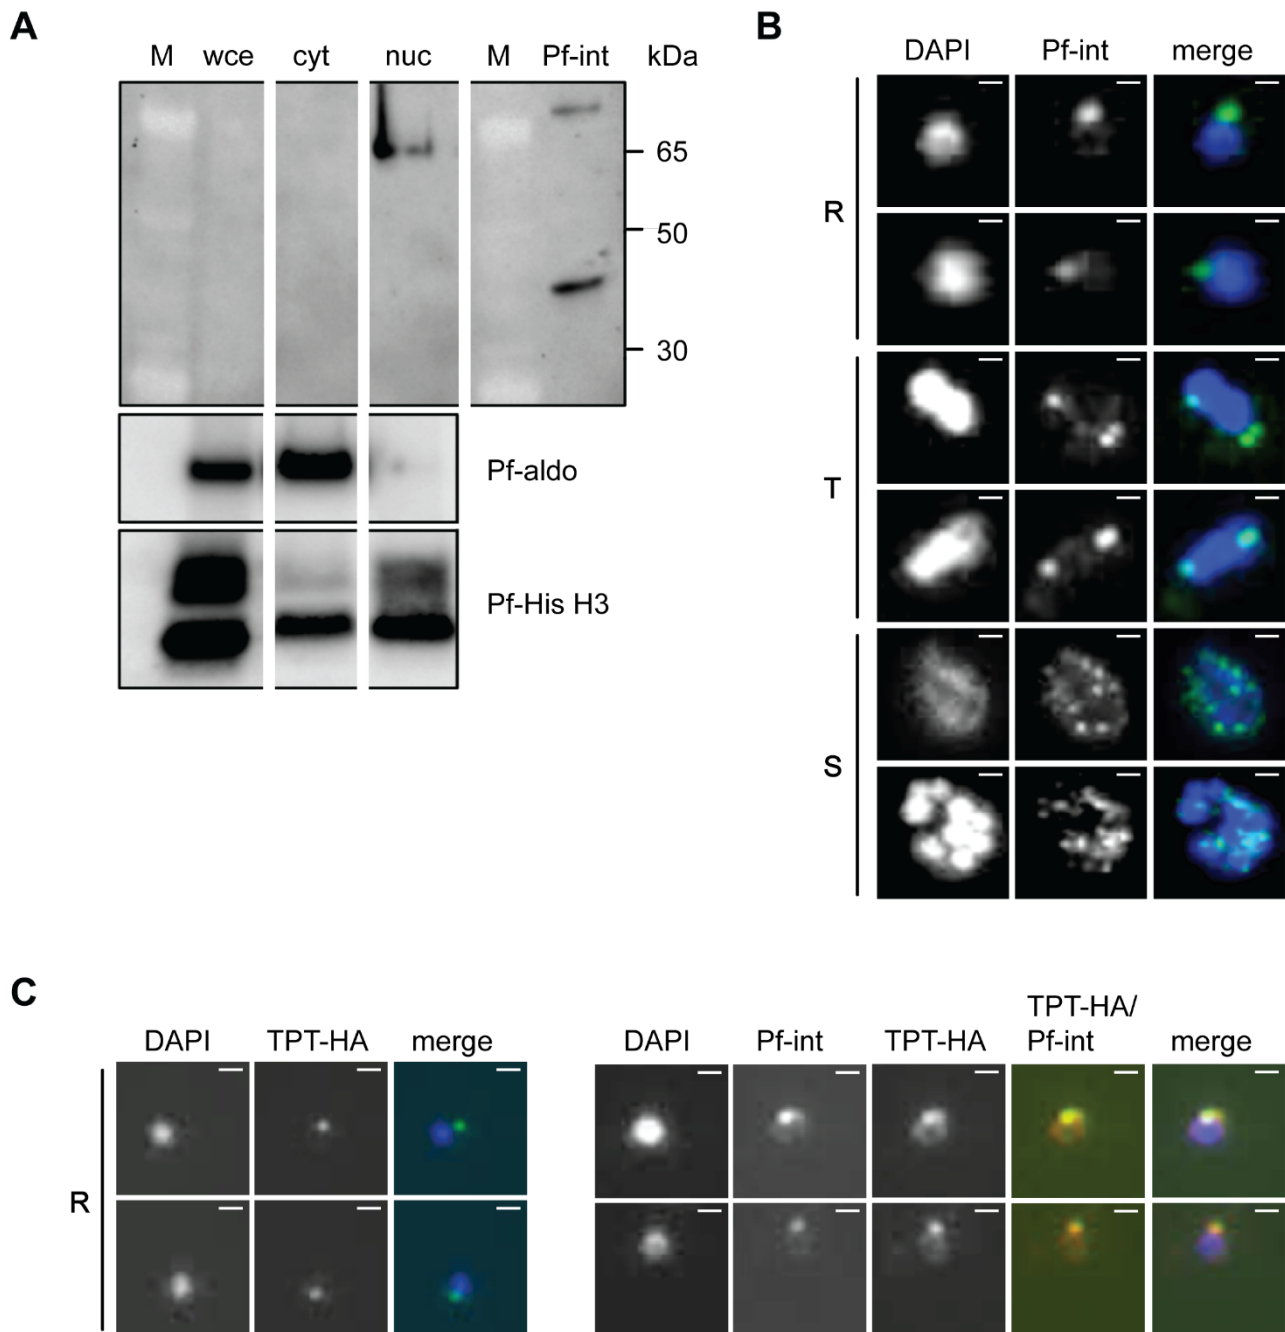

226

227 **Fig 3. Subcellular localization of Pf-int.** A) Pf-int localization studies by western blot. Detection  
228 of Pf-Int in synchronized *P. falciparum* 3D7 parasites: Ring stage whole cell extract (wce),  
229 cytoplasmic (cyt) and nuclear (nuc) fractions. rat-Anti-Pf-Int primary antibody dilution 1:500,  
230 secondary goat-anti-rat-HRP dilution 1:10,000. Developed with femto kit (ThermoFisher  
231 Scientific). Positive control: purified recombinant Pf-Int (C192, 35 kDa, 0.1  $\mu$ g)(Top Row panel 4).  
232 Loading/ fractionation controls with cytoplasmic marker Pf-aldolase (Pf-aldolase) and nuclear marker  
233 Pf-Histone H3 (Pf-His H3)(Lower panel). B) Initial characterization of anti-Pf-Int in  
234 immunolocalization studies. Anti-Pf-Int gave a punctate pattern, partly at the nuclear periphery

235 (Panel 2 and 3). Shown for 3D7 ring (R), trophozoite (T) and schizont (S) stages. Anti-Pf-Int  
236 (1:250), secondary antibody AlexaFluor®488 (1:1000). The nuclei were stained with DAPI (Panel  
237 1). Images are shown in duplicate for all parasite stages (Black vertical bar). C) Left panels: Anti-  
238 hemagglutinin (HA, green)-tagged PfoTPT localizes adjacent to the nucleus (blue) in PfoTPT-HA  
239 parasites. Right panel: Anti-Pf-Int (green) co-localizes with apicoplast-located PfoTPT (red) in  
240 PfoTPT-HA parasites. Each study is shown for ring (R) stages. Anti-Pf-Int primary antibody  
241 (1:250), mouse-anti-HA primary antibody (1:500); secondary antibodies AlexaFluor®488 (green)  
242 or AlexaFluor®568 (red) (1:1000). The nuclei were stained with DAPI. Images are shown in  
243 duplicate. Scale bar: 2µm.

244



## 245 **Discussion**

246 Overall, our protein localization studies suggest the presence of Int in an organelle adjacent to the  
247 nucleus, very likely the apicoplast. It may reach this organelle thanks to its bipartite leader peptide.  
248 Higher resolution studies such as electron microscopy would be needed to allow the exclusion of  
249 the possibility of a localization within the innermost algal-derived membrane of the organelle  
250 instead of the lumen (see Fig 2). In addition, the localization experiments of Int in *Toxoplasma* by  
251 Sheiner et al (2011) [26] have been reproduced and confirmed by Farhat and Hakimi (not shown).  
252 They observed that Int was co-localized with the apicoplast during different plastid segregation  
253 stages. Accordingly, it can be argued that Int may be intimately associated with DNA transactions,  
254 namely duplication of the plastid DNA, at least in *T. gondii*.

255  
256 As a putative member of the Y-SSR family (conserved active site residues, see S1 Fig), Int could  
257 possibly play a role in apicoplast genome decatenation, or genome separation by hairpin resolution  
258 after rolling circle replication. Many of the replication machinery proteins in the apicoplast are  
259 known, but this is the first report of the presence of an enzyme with the function of a type I  
260 topoisomerase in the apicoplast. Nevertheless, it is noteworthy that Y-SSRs could fulfill the role of  
261 other enzymes such as DNA ligase or telomerase that may also be involved in the maintenance of  
262 apicoplast genome copy number. Both Pf-int and type I topoisomerase rely on the catalytic tyrosine  
263 present in the Y-SSRs for the cleavage of DNA and have significant similarities in sequence and  
264 structure [34, 35]. Topoisomerases proceed with either one or two strand cleavage (Type I/II),  
265 whilst Y-SSR usually cleave only one strand. Moreover, Y-SSRs require a specific sequence or  
266 structure, whereas topoisomerases are non-sequence specific [36]. The identification of specific  
267 DNA targets has so far been tricky, at least for Pf-Int. The potential DNA targets identified by  
268 SELEX and binding experiments by Ghorbal et al. (2012) [17] did not clearly yield a specific  
269 sequence motif. In this aspect, Pf-int could be similar to topoisomerases, which recognize DNA  
270 topology rather than specific sequences.

271

272 Our cellular fractionation experiments showed that Pf-Int is present in the nuclear (thus apicoplast-)  
273 associated fraction. Moreover, dividing cells, i.e. schizonts, also show Pf-int within each daughter  
274 parasite. Functioning as a topoisomerase would mean that Int could play a role in the actual  
275 machinery of the plastid DNA replication. Ligase and telomerase activities are usually needed just  
276 after replication in order to seal the endings of the newly synthesized DNA molecule. Knowing that  
277 the apicoplast genome is present in circular as well as in hairpin-closed linear form, generated by D-  
278 loop- or rolling circle replication [10], both types of functions would be needed in the apicoplast.  
279 HUH nucleases perform similar functions in rolling circle replication initiation and termination  
280 (Chandler et al 2013). HUH recognises hairpin structures (or the ssDNA at the 3' or 5' ends of the  
281 hairpin) [37] described to be present within the arms and at the center of the apicoplast genome's  
282 IR. The possibility for Int to perform a HUH nuclease-like function is therefore also justified.

283

284 Additionally, we hypothesize that Pf-int could have a role in resolving genome concatemers that  
285 occur during rolling circle replication. If rolling circle replication had its origin in the centre region  
286 of the IR, this is where the resulting concatemer would have to be resolved in a site-specific  
287 manner. This scenario however, does not explain the existence of linear apicoplast DNA molecules.  
288 But such linear DNA could have their endings 5'-3' sealed by a telomerase-like enzyme similar to  
289 the hairpin telomere resolvase ResT in *Borrelia* [38]. No such enzyme has been described in the  
290 apicoplast as yet. HUH nucleases, have been reported to often have, apart from the HUH domain,  
291 domains with other activities, such as helicase or primase activity (Chandler et al. 2013). To this  
292 end, also a domain with telomerase function could be imagined. However, as similar as HUH  
293 nucleases and Y-SSRs may be, there are also striking differences: In contrast to Y-SSRs, which  
294 establish the phosphotyrosine at the 3' end of the DNA, liberating a 5' OH, HUH establishes the  
295 phosphotyrosine at the 5' end, liberating the 3' end for further processing (priming replication and/

296 or termination of replication). While Y-SSRs do not need high energy factors, HUH needs divalent  
297 metal ions for activity [37].

298

299 In this work, in line with the *T. gondii* integrase localization results of Sheiner et al. (2011) [26], we  
300 confirmed the probable sub-cellular localization of Pf-int to the apicoplast. This integrase, highly  
301 conserved among Apicomplexa, shown to be essential at least in *P. falciparum* [18], and localized  
302 to the apicoplast, where it may have an important function during DNA replication, could be a  
303 potential novel drug target against diseases caused by Apicomplexans. In the future, this study  
304 could be supplemented by pulling down Int together with apicoplast DNA, or atomic resolution  
305 Cryo-EM of Pf-Int bound to apicoplast, in order to confirm this enzyme's function and validity as a  
306 drug target.

307

308

## 309 **Acknowledgments**

310 Prof. Dr. Artur Scherf (Unité de Biologie des Interactions Hôte-Parasite, Institut Pasteur, Paris, F-  
311 75015) for kindly providing consumables and lab space to A. V. Berglar for IFA experiments.

312

313 Dr. Shuai Ding (Unité de Biologie des Interactions Hôte-Parasite, Institut Pasteur, Paris, F-75015 ;  
314 Prof. A. Scherf's lab) for providing the *P. falciparum* TPT-HA parasite strain.

315

316 Dr. Dayana C. Farhat & Dr. Mohamed-Ali Hakimi (Institute for Advanced Biosciences (IAB),  
317 Team Host-Pathogen Interactions and Immunity to Infection, INSERM U1209, CNRS UMR5309,  
318 University Grenoble Alpes, Grenoble, F-38400) for testing the localization of Tg-Int in *T. gondii*  
319 and for contributing to the discussion in the manuscript.

320

## 321 **Author approvals**

322 All authors have seen and approved the manuscript, and it hasn't been accepted or published  
323 elsewhere.

324

## 325 **Competing interests**

326 I have read BioRxiv's policy and the authors of this manuscript have the following competing  
327 interests: AVB declares a potential conflict of interest in terms of funding for the PhD thesis by  
328 Merck KGaA (Direct: employment, stock ownership, grants, patents). This does not alter our  
329 adherence to BioRxiv policies on sharing data and materials. On behalf of all other authors, the  
330 corresponding author declares that there are no conflicts of interest.

331

## 332 **References**

- 333 1. WHO (2020) World malaria report 2020: 20 years of global progress and challenges.
- 334 2. WHO (2015) Toxoplasmosis Fact Sheet.
- 335 3. Moore RB, Oborník M, Janouskovec J, et al (2008) A photosynthetic alveolate closely  
336 related to apicomplexan parasites. *Nature* 451:959–963
- 337 4. McFadden GI, Reith ME, Munholland J, Lang-Unnasch N (1996) Plastid in human  
338 parasites. *Nature* 381:482
- 339 5. Haider A, Gupta A, Vaish S, Kumar B, Charan M, Mir SS, Tanveer A, Sinha A, Habib  
340 S (2012) Housekeeping and other metabolic functions of the *Plasmodium* plastid.  
341 *Current Science* 102:749–756
- 342 6. Lim L, McFadden GI (2010) The evolution, metabolism and functions of the  
343 apicoplast. *Philosophical Transactions of the Royal Society* 365:749–763
- 344 7. Ralph SA, van Dooren GG, Waller RF, Crawford MJ, Fraunholz MJ, Foth BJ, Tonkin  
345 CJ, Roos DS, McFadden GI (2004) Metabolic maps and functions of the *Plasmodium*  
346 *falciparum* apicoplast. *Nature Reviews Microbiology* 2:203–216
- 347 8. Jomaa H, Wiesner J, Sanderbrand S, et al (1999) Inhibitors of the nonmevalonate  
348 pathway of isoprenoid biosynthesis as antimalarial drugs. *Science* 285:1573–1576
- 349 9. Ralph SA, van Dooren GG, Waller RF, Crawford MJ, Fraunholz MJ, Foth BJ, Tonkin  
350 CJ, Roos DS, McFadden GI (2004) Tropical infectious diseases: metabolic maps and  
351 functions of the *Plasmodium falciparum* apicoplast. *Nature Reviews Microbiology*  
352 2:203–16
- 353 10. Williamson DH, Preiser PR, Moore PW, McCready S, Strath M, Wilson RJM (2002)  
354 The plastid DNA of the malaria parasite *Plasmodium falciparum* is replicated by two  
355 mechanisms. *Molecular Microbiology* 45:533–42
- 356 11. Waller RF, Keeling PJ, Donald RG, Striepen B, Handman E, Lang-Unnasch N,  
357 Cowman a F, Besra GS, Roos DS, McFadden GI (1998) Nuclear-encoded proteins

- 358 target to the plastid in *Toxoplasma gondii* and *Plasmodium falciparum*. Proceedings of  
359 the National Academy of Sciences of the United States of America 95:12352–12357
- 360 12. Waller RF, Reed MB, Cowman AF, Mcfadden GI (2000) Protein trafficking to the  
361 plastid of *Plasmodium falciparum* is via the secretory pathway. The EMBO Journal  
362 19:1794–1802
- 363 13. Tonkin CJ, Struck NS, Mullin KA, Stimmler LM, McFadden GI (2006) Evidence for  
364 Golgi-independent transport from the early secretory pathway to the plastid in malaria  
365 parasites. Molecular Microbiology 61:614–630
- 366 14. Richardson LGL, Paila YD, Siman SR, Chen Y, Smith MD, Schnell DJ (2014)  
367 Targeting and assembly of components of the TOC protein import complex at the  
368 chloroplast outer envelope membrane. Frontiers in Plant Science 5:269
- 369 15. Ling Q, Jarvis P (2015) Functions of plastid protein import and the ubiquitin–  
370 proteasome system in plastid development. Biochimica et Biophysica Acta (BBA) -  
371 Bioenergetics 1847:939–948
- 372 16. Wilson RJ, Denny PW, Preiser PR, et al (1996) Complete gene map of the plastid-like  
373 DNA of the malaria parasite *Plasmodium falciparum*. Journal of Molecular Biology  
374 261:155–172
- 375 17. Ghorbal M, Scheidig-Benatar C, Bouizem S, Thomas C, Paisley G, Faltermeier C, Liu  
376 M, Scherf A, Lopez-Rubio J-J, Gopaul DN (2012) Initial Characterization of the Pf-Int  
377 Recombinase from the MalariaParasite *Plasmodium falciparum*. PloS one 7:e46507
- 378 18. Zhang M, Wang C, Otto TD, et al (2018) Uncovering the essential genes of the human  
379 malaria parasite *Plasmodium falciparum* by saturation mutagenesis. Science 360:1–26
- 380 19. Grindley NDF, Whiteson KL, Rice P a (2006) Mechanisms of site-specific  
381 recombination. Annual Review of Biochemistry 75:567–605



- 382 20. Reed RR, Grindley ND (1981) Transposon-mediated site-specific recombination in  
383 vitro: DNA cleavage and protein-DNA linkage at the recombination site. *Cell* 25:721–  
384 728
- 385 21. Escudero JA, Loot C, Nivina A, Mazel D (2014) The Integron: Adaptation On  
386 Demand. *Microbiology Spectrum* 3:MDNA3-0019–2014
- 387 22. Cody JP, Graham ND, Zhao C, Swyers NC, Birchler JA (2020) Site-specific  
388 recombinase genome engineering toolkit in maize. *Plant Direct* 4:1–9
- 389 23. Craig NL (2015) *Mobile DNA III*, 3rd ed. IEEE Micro.  
390 <https://doi.org/10.1109/MM.2009.63>
- 391 24. Ghorbal M (2012) Caractérisation biochimique , structurale et fonctionnelle de Pf-Int :  
392 une recombinase à site spécifique potentielle de *Plasmodium falciparum*. Université  
393 Paris-Sud 11
- 394 25. Prasad A, Mastud P, Patankar S (2020) Dually localized proteins found in both the  
395 apicoplast and mitochondrion utilize the Golgi-dependent pathway for apicoplast  
396 targeting in *Toxoplasma gondii*. *Biology of the Cell*.  
397 <https://doi.org/10.1111/boc.202000050>
- 398 26. Sheiner L, Demerly JL, Poulsen N, Beatty WL, Lucas O, Behnke MS, White MW,  
399 Striepen B (2011) A systematic screen to discover and analyze apicoplast proteins  
400 identifies a conserved and essential protein import factor. *PLoS Pathogens*.  
401 <https://doi.org/10.1371/journal.ppat.1002392>
- 402 27. Amor Y, Babiychuk E, Inzé D, Levine A (1998) The involvement of poly(ADP-  
403 ribose) polymerase in the oxidative stress responses in plants. *FEBS Letters* 440:1–7
- 404 28. Aravind L, Koonin E V. (2000) SAP - A putative DNA-binding motif involved in  
405 chromosomal organization. *Trends in Biochemical Sciences* 25:112–114

- 406 29. Walliker D, Quakyi IA, Wellems TE, McCutchan TF, Szarfman A, London WT,  
407 Corcoran LM, Burkot TR, Carter R (1987) Genetic analysis of the human malaria  
408 parasite *Plasmodium falciparum*. *Science* 26:1661–1666
- 409 30. Trager W, Jensen JB (1967) Human Malaria Parasites in Continuous Culture. *Science*  
410 193:673–675
- 411 31. Lambros C, Vanderberg JP (1979) Synchronization of *Plasmodium falciparum*  
412 Erythrocytic Stages in Culture. *The Journal of Parasitology* 65:418–420
- 413 32. Oehring SC, Woodcroft BJ, Moes S, et al (2012) Organellar proteomics reveals  
414 hundreds of novel nuclear proteins in the malaria parasite *Plasmodium falciparum*.  
415 *Genome Biology* 13:R108
- 416 33. Mullin K a, Lim L, Ralph S a, Spurck TP, Handman E, McFadden GI (2006)  
417 Membrane transporters in the relict plastid of malaria parasites. *Proceedings of the*  
418 *National Academy of Sciences of the United States of America* 103:9572–9577
- 419 34. Perry K, Hwang Y, Bushman FD, Van Duyne GD (2010) Insights from the Structure  
420 of a Smallpox Virus Topoisomerase-DNA Transition State Mimic. *Cell Press* 18:127–  
421 137
- 422 35. Gibb B, Gupta K, Ghosh K, Sharp R, Chen J, Van Duyne GD (2010) Requirements  
423 for catalysis in the Cre recombinase active site. *Nucleic Acid Research* 38:5817–32
- 424 36. Minkah N, Hwang Y, Perry K, Van Duyne GD, Hendrickson R, Lefkowitz EJ,  
425 Hannehalli S, Bushman FD (2007) *Variola* virus topoisomerase: DNA cleavage  
426 specificity and distribution of sites in Poxvirus genomes. *Virology* 365:60–69
- 427 37. Chandler M, de la Cruz F, Dyda F, Hickman AB, Moncalian G, Ton-Hoang B (2013)  
428 Breaking and joining single-stranded DNA: the HUH endonuclease superfamily.  
429 *Nature Reviews Microbiology* 11:525–38
- 430 38. Chaconas G, Kobryn K (2010) Structure, function, and evolution of linear replicons in  
431 *Borrelia*. *Annual Review of Microbiology* 64:185–202
